# Supplementary material
Source: Springer Nature journal article supplement (https://www.springermedizin.de/resource/supplementary/12913_2012_2114_MOESM1_ESM.pdf/9530034)

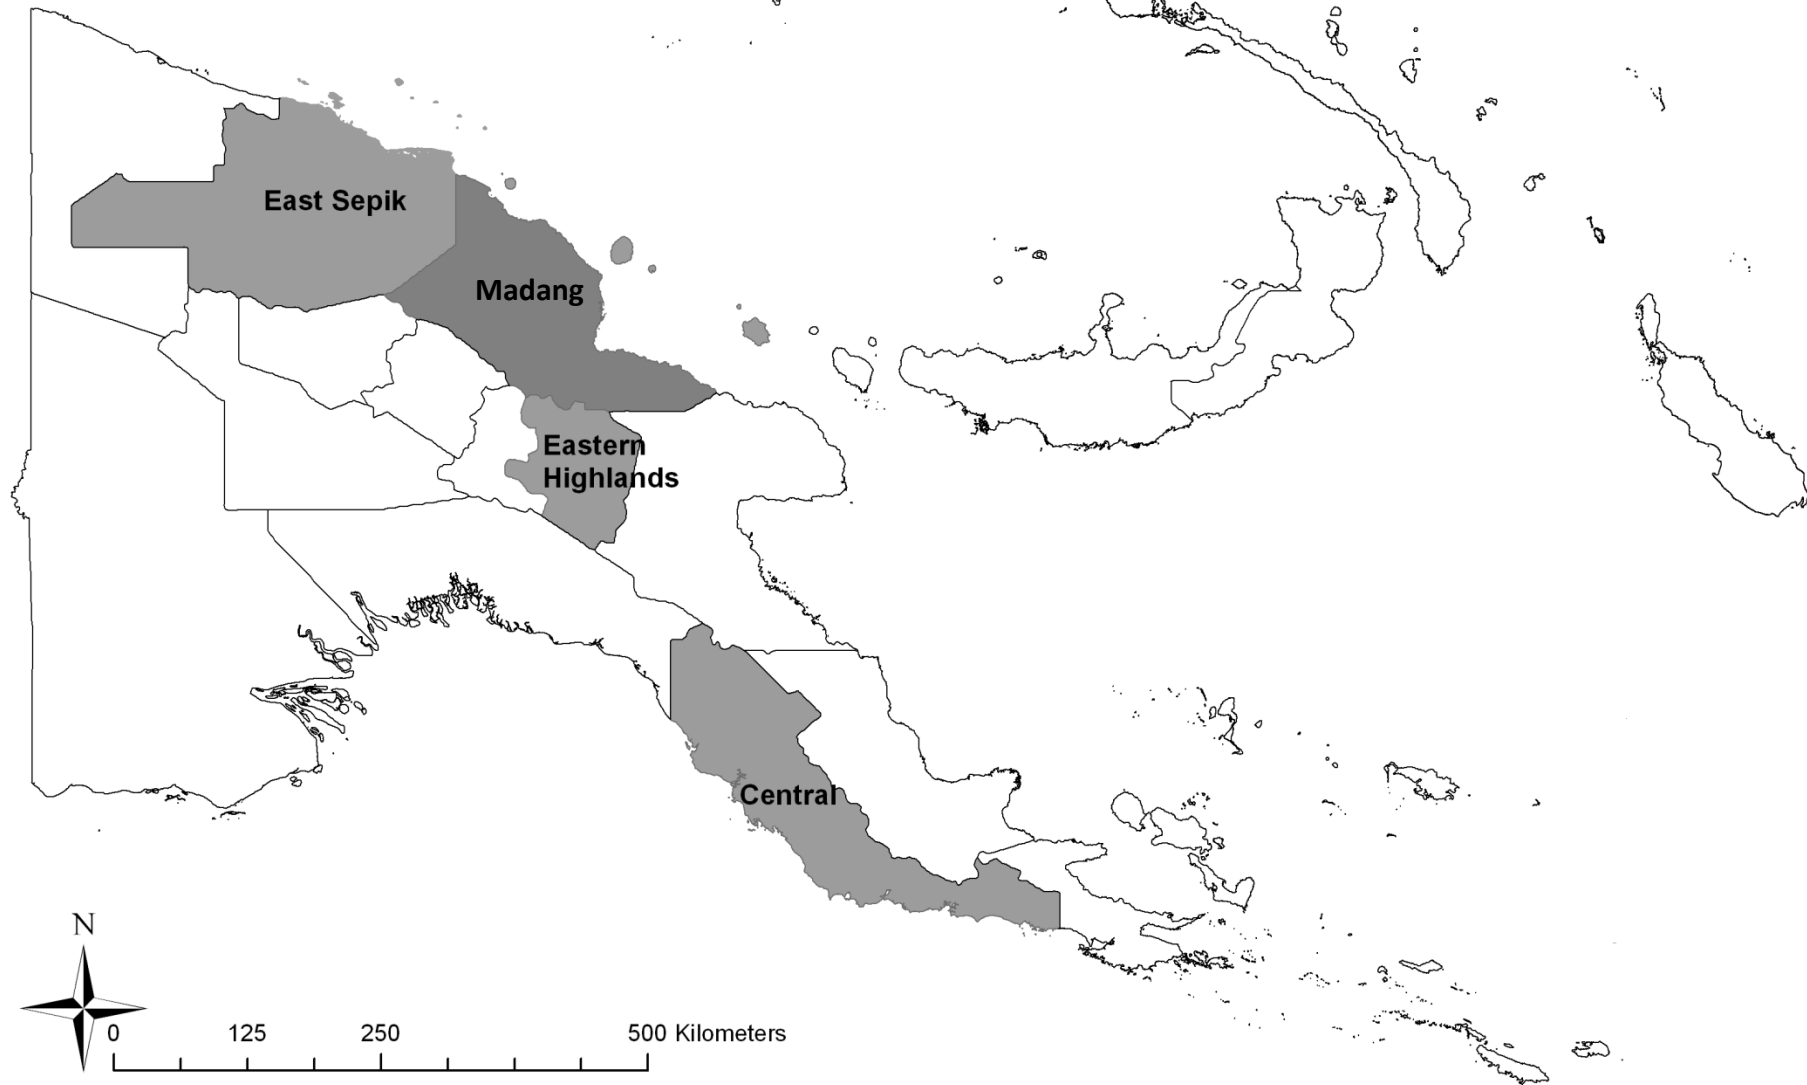

Supplement: MOESM1 [file 9530034]
